# Supplementary material for: Damage-Induced Mutation Clustering in Gram-Positive Bacteria: Preliminary Data
Source: MDPI journal article supplement (doi:10.3390/sym14071431), 2022-07-12
Supplement: s1 [file s1]

**Table S1. A comparative table of detected C-to-T and G-to-A transitions in *B. subtilis* colony #1 and control sample.**

| Genome position | Control | Colony #1 | Genome position | Control | Colony #1 |
|-----------------|---------|-----------|-----------------|---------|-----------|
| 105002          | G       | A         | 3125401         | G       | A         |
| 143490          | G       | A         | 3146390         | G       | A         |
| 188912          | G       | A         | 3182848         | G       | A         |
| 326696          | C       | T         | 3201699         | G       | A         |
| 330677          | C       | T         | 3255604         | G       | A         |
| 380251          | C       | T         | 3422858         | G       | A         |
| 432809          | C       | T         | 3428397         | G       | A         |
| 457493          | C       | T         | 3449074         | G       | A         |
| 488791          | C       | T         | 3460163         | G       | A         |
| 625505          | C       | T         | 3511361         | G       | A         |
| 628167          | C       | T         | 3514552         | G       | A         |
| 749768          | C       | T         | 3519118         | C       | T         |
| 811175          | C       | T         | 3589991         | G       | A         |
| 1077533         | G       | A         | 3627055         | G       | A         |
| 1105133         | G       | A         | 3632376         | G       | A         |
| 1168054         | C       | T         | 3671033         | G       | A         |
| 1279547         | C       | T         | 3707362         | G       | A         |
| 1448238         | C       | T         | 3710218         | G       | A         |
| 1509527         | C       | T         | 3724053         | G       | A         |
| 1619902         | C       | T         | 3731663         | G       | A         |
| 1930131         | C       | T         | 3839052         | G       | A         |
| 1996356         | C       | T         | 3910528         | G       | A         |
| 2415025         | G       | A         | 3938713         | G       | A         |
| 2485335         | G       | A         | 3947187         | G       | A         |
| 2526168         | G       | A         | 3961227         | G       | A         |
| 2577548         | G       | A         | 3977116         | G       | A         |
| 2830834         | G       | A         | 4098538         | G       | A         |
| 2845418         | G       | A         | 4182884         | G       | A         |
| 2863900         | G       | A         | 4186299         | G       | A         |
| 2977323         | G       | A         | 4193978         | G       | A         |
| 3125401         | G       | A         | 4213591         | G       | A         |
