# Supplementary material for: Damage-Induced Mutation Clustering in Gram-Positive Bacteria: Preliminary Data
Source: MDPI journal article supplement (doi:10.3390/sym14071431), 2022-07-12
Supplement: s1 [file s1]

**Table S3. A comparative table of detected C-to-T and G-to-A transitions in *B. subtilis* colony #4 and control sample.**

| Genome position | Control | Colony #4 |
|-----------------|---------|-----------|
| 61688           | C       | T         |
| 166344          | G       | A         |
| 229379          | C       | T         |
| 368621          | C       | T         |
| 477724          | C       | T         |
| 565074          | C       | T         |
| 714635          | C       | T         |
| 776711          | C       | T         |
| 1041611         | C       | T         |
| 1816912         | G       | A         |
| 2271505         | C       | T         |
| 2349193         | G       | A         |
| 3283273         | C       | T         |
| 3580268         | C       | T         |
| 3651982         | C       | T         |
| 4031207         | C       | T         |
