# Supplementary material for: Damage-Induced Mutation Clustering in Gram-Positive Bacteria: Preliminary Data
Source: MDPI journal article supplement (doi:10.3390/sym14071431), 2022-07-12
Supplement: s1 [file s1]

**Table S2. A comparative table of detected C-to-T and G-to-A transitions in *B. subtilis* colony #3 and control sample.**

| <b>Genome position</b> | <b>Control</b> | <b>Colony #3</b> |
|------------------------|----------------|------------------|
| 8732                   | C              | T                |
| 57808                  | G              | A                |
| 277986                 | G              | A                |
| 294799                 | C              | T                |
| 332137                 | G              | A                |
| 334292                 | C              | T                |
| 432556                 | G              | A                |
| 942625                 | C              | T                |
| 1109815                | G              | A                |
| 2191728                | G              | A                |
| 2794485                | C              | T                |
| 2835504                | C              | T                |
| 2852991                | C              | T                |
| 3310229                | C              | T                |
| 3500210                | G              | A                |
| 3536742                | C              | T                |
| 3539376                | G              | A                |
| 3769625                | G              | A                |
| 3979629                | C              | T                |
| 4148059                | G              | A                |
| 4152456                | G              | A                |
| 4157962                | C              | T                |
| 4163078                | C              | T                |
| 4173394                | C              | T                |
